# Supplementary material for: Actinomyces Produces Defensin-Like Bacteriocins (Actifensins) with a Highly Degenerate Structure and Broad Antimicrobial Activity
Source: PubMed Central journal article supplement (PMC6989792; doi:10.1128/jb.00529-19), 2020-01-29
Supplement: JB.00529-19-s0004.pdf [file JB.00529-19-s0004.pdf]

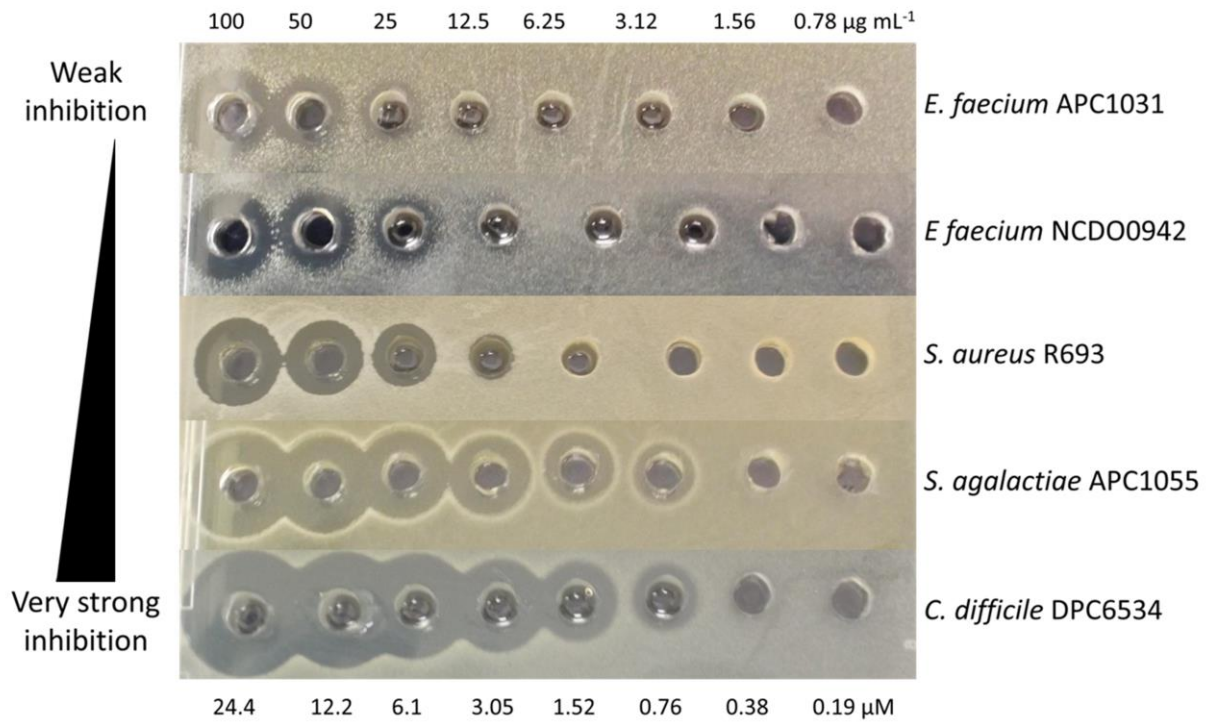

Supplementary Figure 1. Minimum inhibitory concentration of actifensin peptide against Gram positive pathogens determined by well diffusion assay.

| Phylum         | Species                           | Per. Identity | Description                    |                                                                                                                             |
|----------------|-----------------------------------|---------------|--------------------------------|-----------------------------------------------------------------------------------------------------------------------------|
| Actinobacteria | <i>A. ruminicola</i>              | -             | AfnA                           | -----GFGCNLITSNPKCSNHCKSV-GRGGYCKLRTVCTCY-----                                                                              |
| Ascomycota     | <i>Helicocarpus griseus</i>       | 52.26         | hypothetical protein           | MRFSTVFAVVSALSMTALALPSPVTEDVNLAE-----REAAPEPMPEELVAAFTKLGERSLEGEEDN----VI AKRFGGCTIWGGNDKPCRHRCKSIKGYKGGYCKVGGVCKCY-----    |
| Ascomycota     | <i>Blastomyces percursus</i>      | 57.89         | hypothetical protein           | MRLSAVFFAIISALSMTALAIPAPAPEDLDIAEATADLATRDAPVEAIPDDFVGDLAGLNDDDDDDDEDERPAHALQKRWGCGNI FGGNDYRCHRCKSIKGYKGGYCKLGGI CKCY----- |
| Ascomycota     | <i>Blastomyces silverae</i>       | 57.89         | hypothetical protein           | MRFSAVFAIISALSMTALAIPAPAPEDLDIAEATADLAARDARMGAI PDDFAGDLAGLDDDDDDDEDENPARTLQKRWGCGNI FGGNDYRCHRCKSIKGYKGGYCKLGGI CKCY-----  |
| Ascomycota     | <i>Blastomyces gilchristii</i>    | 57.89         | conserved hypothetical protein | MRFSAVFAIISALSMTALAIPAPAPEDLDIAEATADLAARDAPVEAIPDDFAGDVSGLDDEDD----ENSAGALQKRWGCGNI FGGNDYRCHRCKSIKGYKGGYCKLGGI CKCY-----   |
| Ascomycota     | <i>Blastomyces dermatitidis</i>   | 57.89         | hypothetical protein           | MRFSAVFAIISALSMTALAIPVPAPEDLDIAEATADLAARDAPVEAIPDDFAGDVSGLDDEDDDDDEDENSAGALQKRWGCGNI FGGNDYRCHRCKSIKGYKGGYCKLGGI CKCY-----  |
| Ascomycota     | <i>Blastomyces dermatitidis</i>   | 57.89         | hypothetical protein           | MRFSAVFAIISALSMTALAIPAPAPEDLDIAEATADLAARDAPVEAIPDDFAGDVSGLDDEDDDDDEDENSAGALQKRWGCGNI FGGNDYRCHRCKSIKGYKGGYCKLGGI CKCY-----  |
| Ascomycota     | <i>Emmonsia crescens</i>          | 55.26         | hypothetical protein           | MRFSAFIAIISALSMTALAMPAPAPEDFDIAEAAADLAARNAPADAIPDDFAGDLAGMDDDDDDDDY-ENSVGSLQKRWGCGTI FGGNDSRCHRCKSIKGYRGGYCKLGGI CKCY-----  |
| Ascomycota     | <i>Emmonsia sp.</i>               | 55.26         | hypothetical protein           | MRSAIFAIISALSMTTLAMPAAAPEDFDIAAATADLAARGAPAEAIPDDFAGDLAGLDDDDDDDDEND-SAGVLQKRWGCGTI FGGNDSRCHRCKSIKGYRGGYCKLGGI CKCY-----   |
| Ascomycota     | <i>Emergomycetes pasteurianus</i> | 55.26         | hypothetical protein           | MRVSAI LAIISALSMTALAIPAPAPEDFDIAEATADLAARDAPAEAVPDDFAGDLAGLDDDDDDDDY-ENSAGVLQKRWGCGTI FGGNDSRCHRCKSIKGYRGGYCKLGGI CKCY----- |
| Mollusca       | <i>Ruditapes philippinarum</i>    | 60.53         | defensin                       | MKMMIVFTV---LFLAAMILP-----DVDA-----GFGCP-----NDYSCSNHCRDSIGCRGGYCKYHVICTCYGCKKRRSIQE                                        |

Supplementary Figure 2. Eukaryotic sequences with homology to afnA identified using BLASTp. Residues with 100% identity are highlighted.



Supplementary Figure 3. Percent-identity matrix of actifensin

(Actifensin\_ruminicola\_DPC7226\_afnA) mature peptide amino acid sequence and homologous afnA sequences.

Supplementary Table 1. *Actinomyces* genomes used in in silico screen.

Supplimentary Table 2. afnA mature sequences and source genomes.

Supplementary Table 3. Growth conditions of indicator species used in this study.

## References

1. Dash TS, Shafee T, Harvey PJ, Zhang C, Peigneur S, Deuis JR, Vetter I, Tytgat J, Anderson MA, Craik DJ. 2019. A centipede toxin family defines an ancient class of CS $\alpha\beta$  defensins. *Structure* 27:315-326. e7.
